# Supplementary material for: Highly Stretchable Graphene Scrolls Transistors for Self-Powered Tribotronic Non-Mechanosensation Application
Source: Nanomaterials (Basel). 2023 Jan 28;13(3):528. doi: 10.3390/nano13030528 (PMC9920215; doi:10.3390/nano13030528)
Supplement: Supplementary file 1 [file nanomaterials-13-00528-s001.zip › nanomaterials-1755578-supplementary.pdf]

# Highly Stretchable Graphene Scrolls Transistors for Self-Powered Tribotronic Non-Mechanosensation Application

Yanfang Meng<sup>1,2,3</sup>

<sup>1</sup> State Key Laboratory of Advanced Optical Communications System and Networks, School of Electronics Engineering and Computer Science, Peking University, Beijing 100871, China

<sup>2</sup> Beijing Institute of Nanoenergy and Nanosystems, Chinese Academy of Sciences, Beijing 100083, China

<sup>3</sup> School of Nanoscience and Technology, University of Chinese Academy of Sciences, Beijing 100049, China

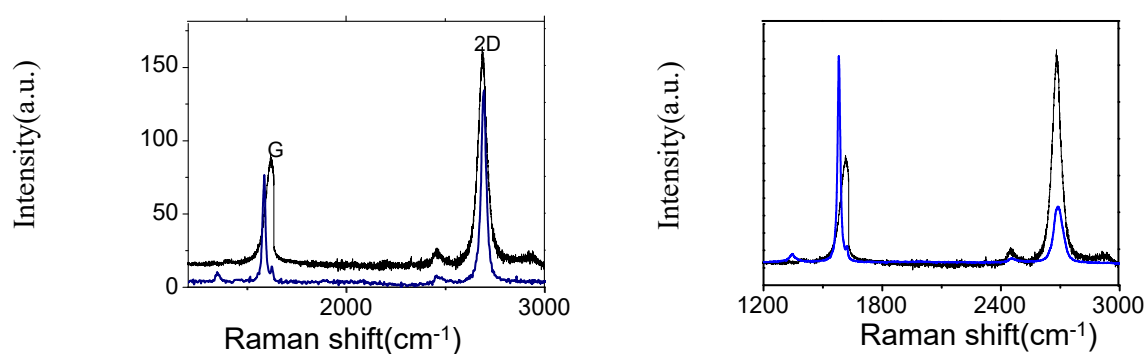

**Figure S1.** Left panel: Comparison of Raman spectrum of the CVD single-layer graphene (blank line) and monolayer graphene scroll (blue line). Right panel: Comparison of Raman spectrum of the monolayer graphene scroll (blank line) and trilayer graphene scrolls (blue line).

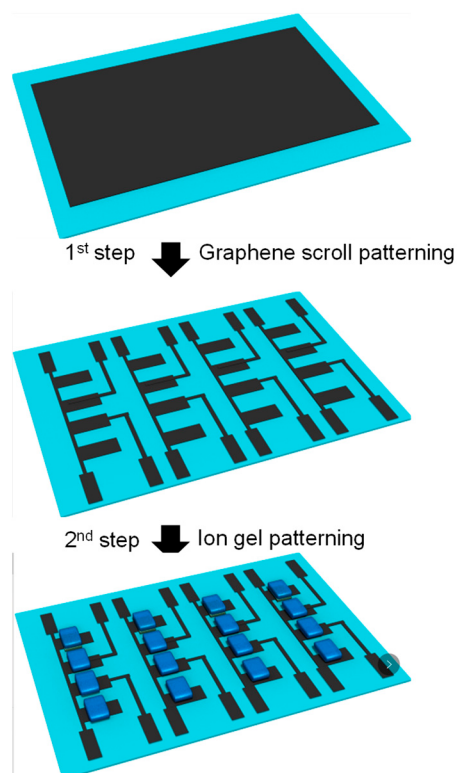

**Figure S2.** Fabrication procedure of the tribopotential-gated GSFET array.

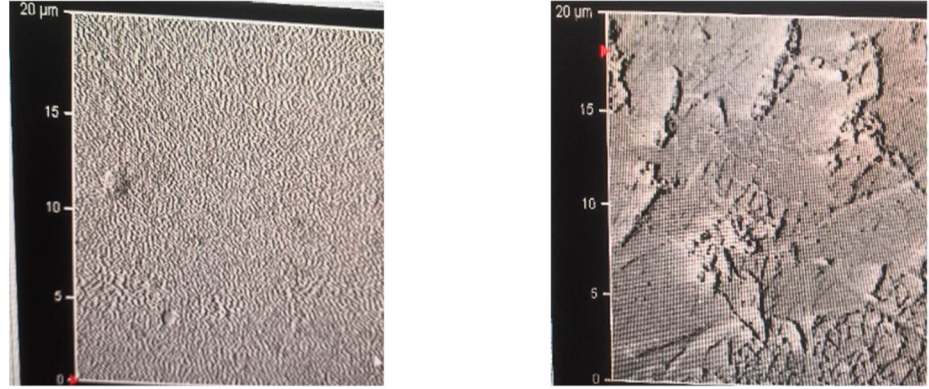

**Figure S3.** AFM (atom force microscopy) of the monolayer graphene (left panel) and trilayer graphene scrolls (right panel).

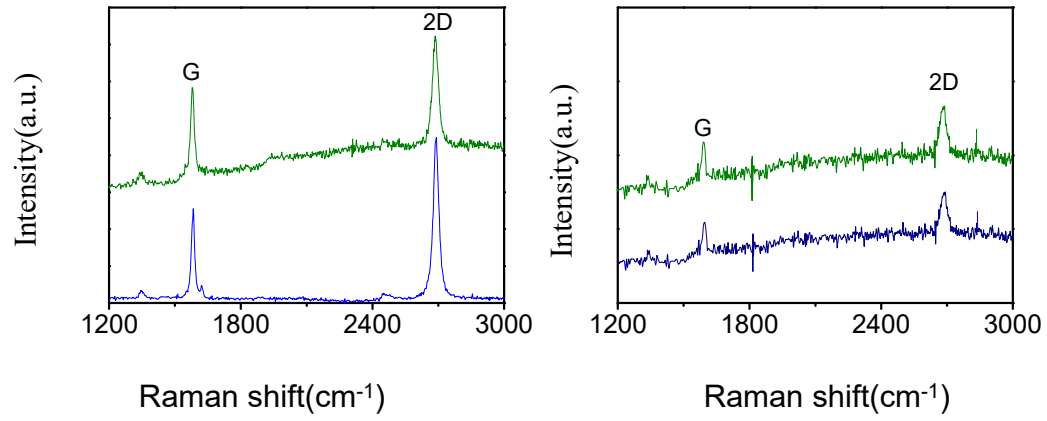

**Figure S4.** Raman characteristic of graphene under strain. Left panel: comparison of Raman spectrum of the CVD single-layer graphene under no strain (blue line) and under a 5% strain (green line). Right panel: comparison of Raman spectrum of the trilayer graphene scrolls under no strain (blue line) and under a 5% strain (green line).

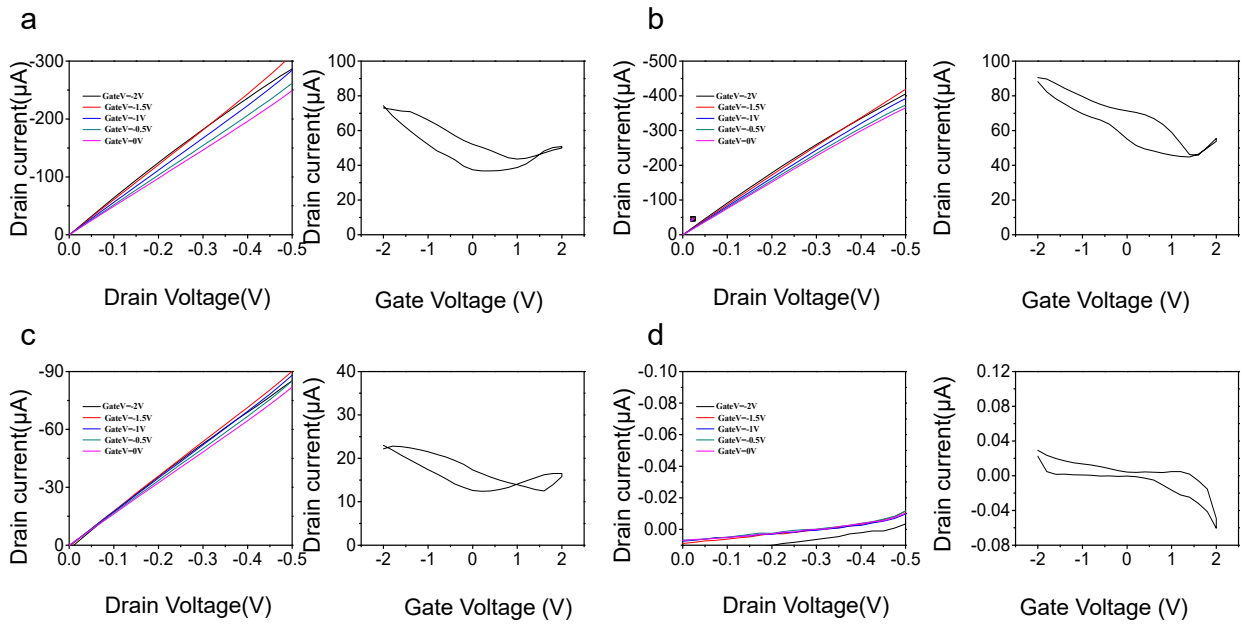

**Figure S5.** Electrical properties of GFET/GSFET under strain deformation (a) Output curve (left panel) and transfer curve (at the given  $V_D=0.1$  V, right panel) of GSFET under no strain deformations. (b) Output curve (left panel) and transfer curve (at the given  $V_D=0.1$  V, right panel) of GSFET under 5% strain deformations. (c) Output curve (left panel) and transfer curve (at the given  $V_D=0.1$  V, right panel) of GFET under no strain deformations. (d) Output curve (left panel) and transfer curve (at the given  $V_D=0.1$  V, right panel) of GFET under 5% strain deformations.

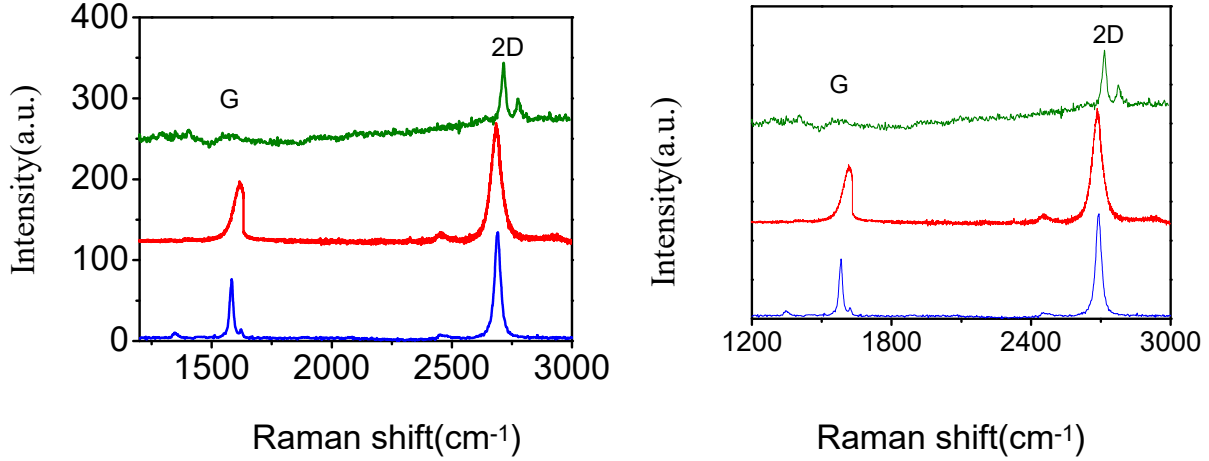

**Figure S6.** Left panel: comparison of Raman spectrum of the CVD single-layer graphene under room temperature (blue line), 30°C (red line) and under a 5% strain (green line). Right panel: comparison of Raman spectrum of the tri-layer graphene scrolls under room temperature (blue line), 30°C (red line) and under a 5% strain (green line).

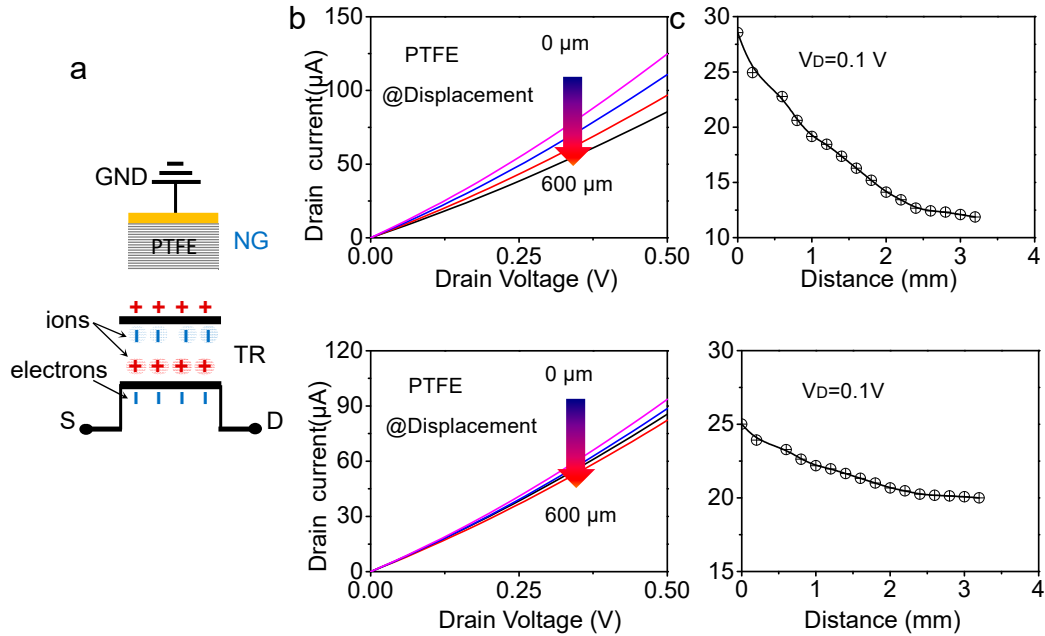

**Figure S7.** Triboelectrical performances of GFET/GSFET by tribo-potential between ion gel and PTFE (a) Circuit diagram of tribotronic GFET/GSFET sensor contact with PTFE. (b) Output curve (left panel) and transfer curve (at the given  $V_D=0.1$  V, right panel) of GFET powered by tribopotential between ion gel and PTFE under no strain deformations. (c) Output curve (left panel) and transfer curve (at the given  $V_D=0.1$  V, right panel) of GSFET powered by tribopotential between ion gel and PTFE under no strain deformations.

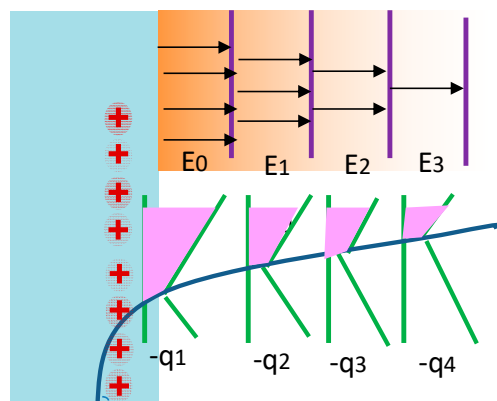

## EDL

**Figure S8.** Schematic illustration of degradation of triboelectric responsiveness of trilayer GSFET comparing to monolayer graphene FET.

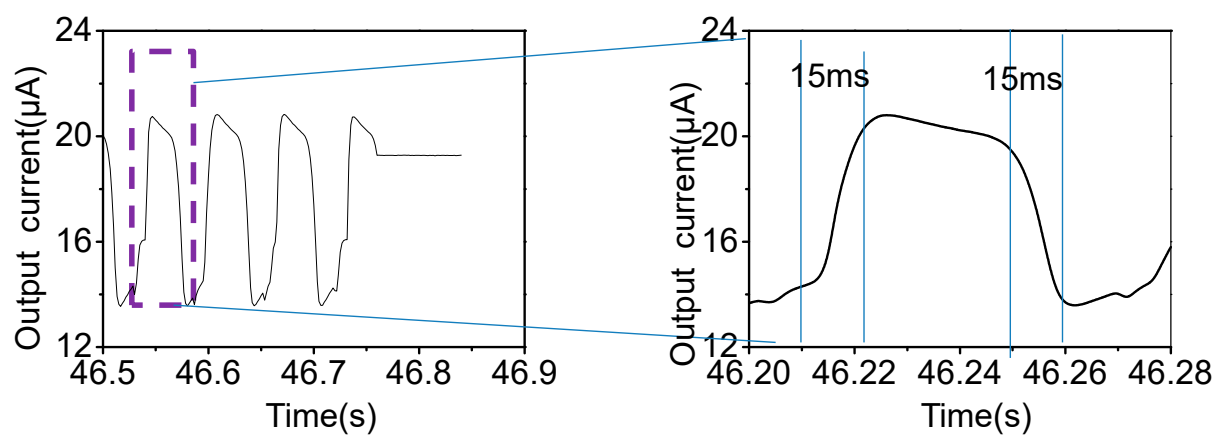

**Figure S9.** The  $I_D$  response time of the GSFET.
